# Supplementary material
Source: HighWire-hosted journal article supplement (https://diabetes.diabetesjournals.org/content/suppl/2007/07/06/db06-1660)
Supplement: DB061660OnlineAppendixFigure1.pdf [file DB061660OnlineAppendixFigure1.pdf]

## Supplementary Figure 1

Figure 1A

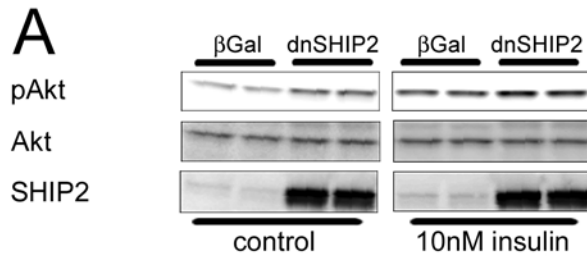

Figure 1B

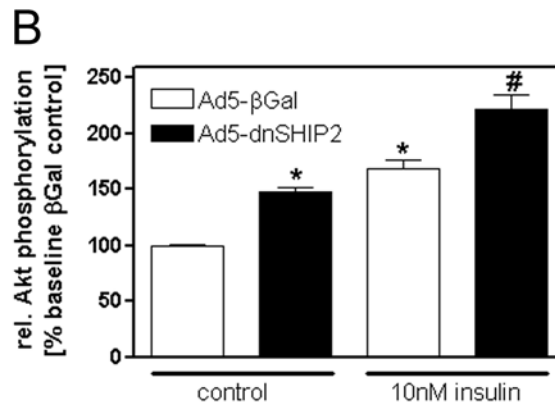

Figure 1C

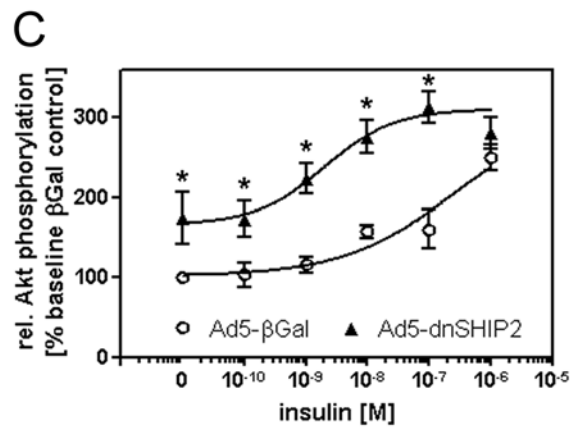

**Supplementary Figure 1      SHIP2 inhibition increases basal and insulin-induced Akt phosphorylation in C3A hepatoma cells.**

C3A cells were infected with adenoviruses expressing  $\beta$ Gal or dnSHIP2 at an MOI of 25. Cells were preincubated without serum for 16 h and incubated with 10 nM insulin or without insulin for 15 min. (A) Cell lysates were subjected to immunoblot analysis with anti-SHIP2, anti-Akt or anti-phospho-(Ser<sup>473</sup>)-specific Akt antibodies. (B) The graph shows the densitometric analysis of three independent experiments. Values represent means  $\pm$  SEM. \*P<0.05 vs.  $\beta$ Gal control without insulin, #P<0.05 vs.  $\beta$ Gal control with 10 nM insulin. (C) Cells were fixed and subjected to Fast Activated Cell-based ELISA (FACE) to determine the amount of phospho-(Ser<sup>473</sup>) Akt relative to the cell number. Results are means of three independent experiments. \*P<0.05 vs.  $\beta$ Gal control at the respective concentration of insulin.

## Supplementary Figure 2

Supplementary Figure 2

### A SHIP2 expression/ Akt phosphorylation

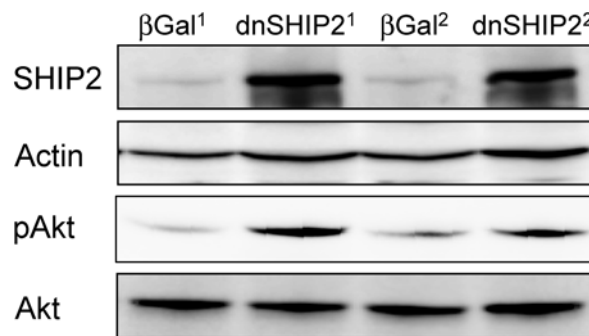

### Supplementary Figure 2 SHIP2 inhibition improves Akt phosphorylation in the liver of KKA<sup>y</sup>-mice in the prandial state.

KKA<sup>y</sup> mice were injected with Ad5- $\beta$ Gal or Ad5-dnSHIP2 via the tail vein at day 1 and fed *ad libitum*. At day 5, the animals were euthanized. Liver tissue was homogenized and lysates were subjected to immunoblot analysis using anti-SHIP2, anti-actin, anti-Akt and anti-phospho-(Ser<sup>473</sup>)-specific Akt antibodies.
